# Supplementary material
Source: Research Square preprint supplement (doi:10.21203/rs.3.rs-9050564/v1)
Supplement: Supplementary file 2 [file c994e1a07c8545693269c5a2.docx]

**Programming of the respiratory epithelium *in utero -* insight from the amniotic epithelial methylome**

Patricia Agudelo-Romero1,2,3*†, Thomas Iosifidis1,4,5,*†, James Lim1, Nina Kresoje1, David G. Hancock1,6,7, Guicheng Zhang1,4, Abhinav Sharma8, Talya Conradie1, Minda Amin1,Yuliya V. Karpievitch1,4,9, Desiree T Silva7,10,11,12, Anthony Bosco13,14, Susan L. Prescott7,10,15,16, Peter N. LeSouëf 1,17, Elizabeth Kicic-Starcevich1, Anthony Kicic1,5,18,19, David J. Martino1,9,#, Stephen M. Stick6,# .

*co-first authors, #co-senior authors, †corresponding authors

**Affiliations:**

1: Wal-yan Respiratory Research Centre, The Kids Research Institute Australia, Perth, 6009, Western Australia, Australia.

2: School of Molecular Sciences, The University of Western Australia, Perth, Western Australia 6009, Australia.

3: European Virus Bioinformatics Centre, Friedrich-Schiller-Universitat Jena, 07737 Jena, Germany.

4: School of Population Health, Curtin University, Perth, 6102, Western Australia, Australia.

5: Centre for Cell Therapy and Regenerative Medicine, School of Medicine and Pharmacology, The University of Western Australia, Perth, 6009, Western Australia, Australia.

6: Department of Respiratory and Sleep Medicine, Perth Children’s Hospital Perth, Perth, 6009, Western Australia, Australia.

7: Medical School, The University of Western Australia, Perth, 6009, Western Australia, Australia.

8: DSI-NRF Centre of Excellence for Biomedical Tuberculosis Research, SAMRC Centre for Tuberculosis Research, Division of Molecular Biology and Human Genetics, Faculty of Medicine and Health Sciences, Stellenbosch University, Cape Town, 7700, South Africa.

9: School of Biomedical Sciences, The University of Western Australia, Perth, 6009, Western Australia, Australia.

10: The Kids Research Institute Australia, Perth, 6009, Western Australia, Australia.

11: School of Medical and Health Sciences, Edith Cowan University, Perth, 6027, Western Australia, Australia.

12: Department of Paediatrics and Neonatology, Joondalup Health Campus, Perth, 6027, Western Australia, Australia.

13: Asthma and Airway Disease Research Center University of Arizona, Tucson, 85721, Arizona, United States.

14: Department of Immunobiology, The University of Arizona College of Medicine, Tucson, 85721, Arizona, United States.

15: Nova Institute for Health, Baltimore, 21231, Maryland, United States.

16: Department of Family and Community Medicine, University of Maryland, Baltimore, 21231, Maryland, United States.

17: School of Paediatrics and Child Health, University of Western Australia, Perth, 6027, Western Australia, Australia.

18: Occupation, Environment and Safety, School of Population Health, Curtin University, Perth, 6102, Western Australia, Australia.

19: Department of Respiratory and Sleep Medicine, Perth Children's Hospital, Perth, 6009, Western Australia, Australia.

***Co-first authors**

**#Co-senior authors**

**†Correspondence:**

To whom correspondence should be addressed:

Dr Patricia Agudelo-Romero: The Kids Research Institute Australia, Perth Children's Hospital, 15 Hospital Avenue, Nedlands, Western Australia, 6009; Email: [Patricia.AgudeloRomero@thekids.org.au](mailto:Patricia.AgudeloRomero@thekids.org.au)

Dr Thomas Iosifidis: The Kids Research Institute Australia, Perth Children's Hospital, 15 Hospital Avenue, Nedlands, Western Australia, 6009; Email: [Thomas.Iosifidis@thekids.org.au](mailto:Thomas.Iosifidis@thekids.org.au)

***Supplementary Data***

**Supplementary Figure 1. Conserved methylation landscape across tissues. (**A) Histogram counts of CpGs annotated to genomic features for the conserved methylome. (B) Significantly enriched biological processes within the conserved methylome for CpGs annotate to nearest transcriptional start sites. Point size represents count of number of genes relative to total genes within the pathway(C) Raw sequencing coverage across the SFTPA1 genet coding region (top panel) and the SCGB3A1 coding region. Ticks in red are methylated reads and blue represents unmethylated reads. Height of the grey silhouettes represents sequencing coverage.

**Supplementary Figure 2. Pathway enrichment of maternal asthma history.** (A) Significantly enriched biological processes within the conserved methylome for CpGs associated with maternal asthma. Point size represents count of number of genes relative to total genes within the pathway. (B)Gene Ontology (GO) enrichment was calculated using genes near CpG sites from the maternal asthma signature, followed by a similarity matrix analysis. The similarity heatmap displays GO terms associated with Biological Process (BP), with colour intensity representing the significance of enrichment.

**Supplementary Figure 3. Pathway enrichment of maternal smoking exposure.** (A) Significantly enriched biological processes within the conserved methylome for CpGs associated with maternal smoking. Point size represents count of number of genes relative to total genes within the pathway. (B)Gene Ontology (GO) enrichment was calculated using genes near CpG sites from the maternal smoking signature, followed by a similarity matrix analysis. The similarity heatmap displays GO terms associated with Biological Process (BP), with colour intensity representing the significance of enrichment.

**Supplementary Figure 4. Analysis Workflow.** This study was conducted in three main phases: Sample processing and sequencing (green), Bioinformatics analysis (blue), and Statistical analysis (pink). The statistical analysis phase was further divided into four key steps: Step 1 – Dimensional reduction using Principal Component Analysis (PCA); Step 2 – Differential methylation analysis at the regional level (differentially methylated regions, DMRs) associated with tissue differences; Step 3 – Differential methylation analysis at the CpG site level (differentially methylated positions, DMPs) associated with tissue differences; Step 4 – Identification of a conserved DMP signature, which was then used to assess associations with gestational exposures (maternal asthma and maternal smoking). MD: Mean Difference; FDR: False Discovery Rate; FC: Fold Change.


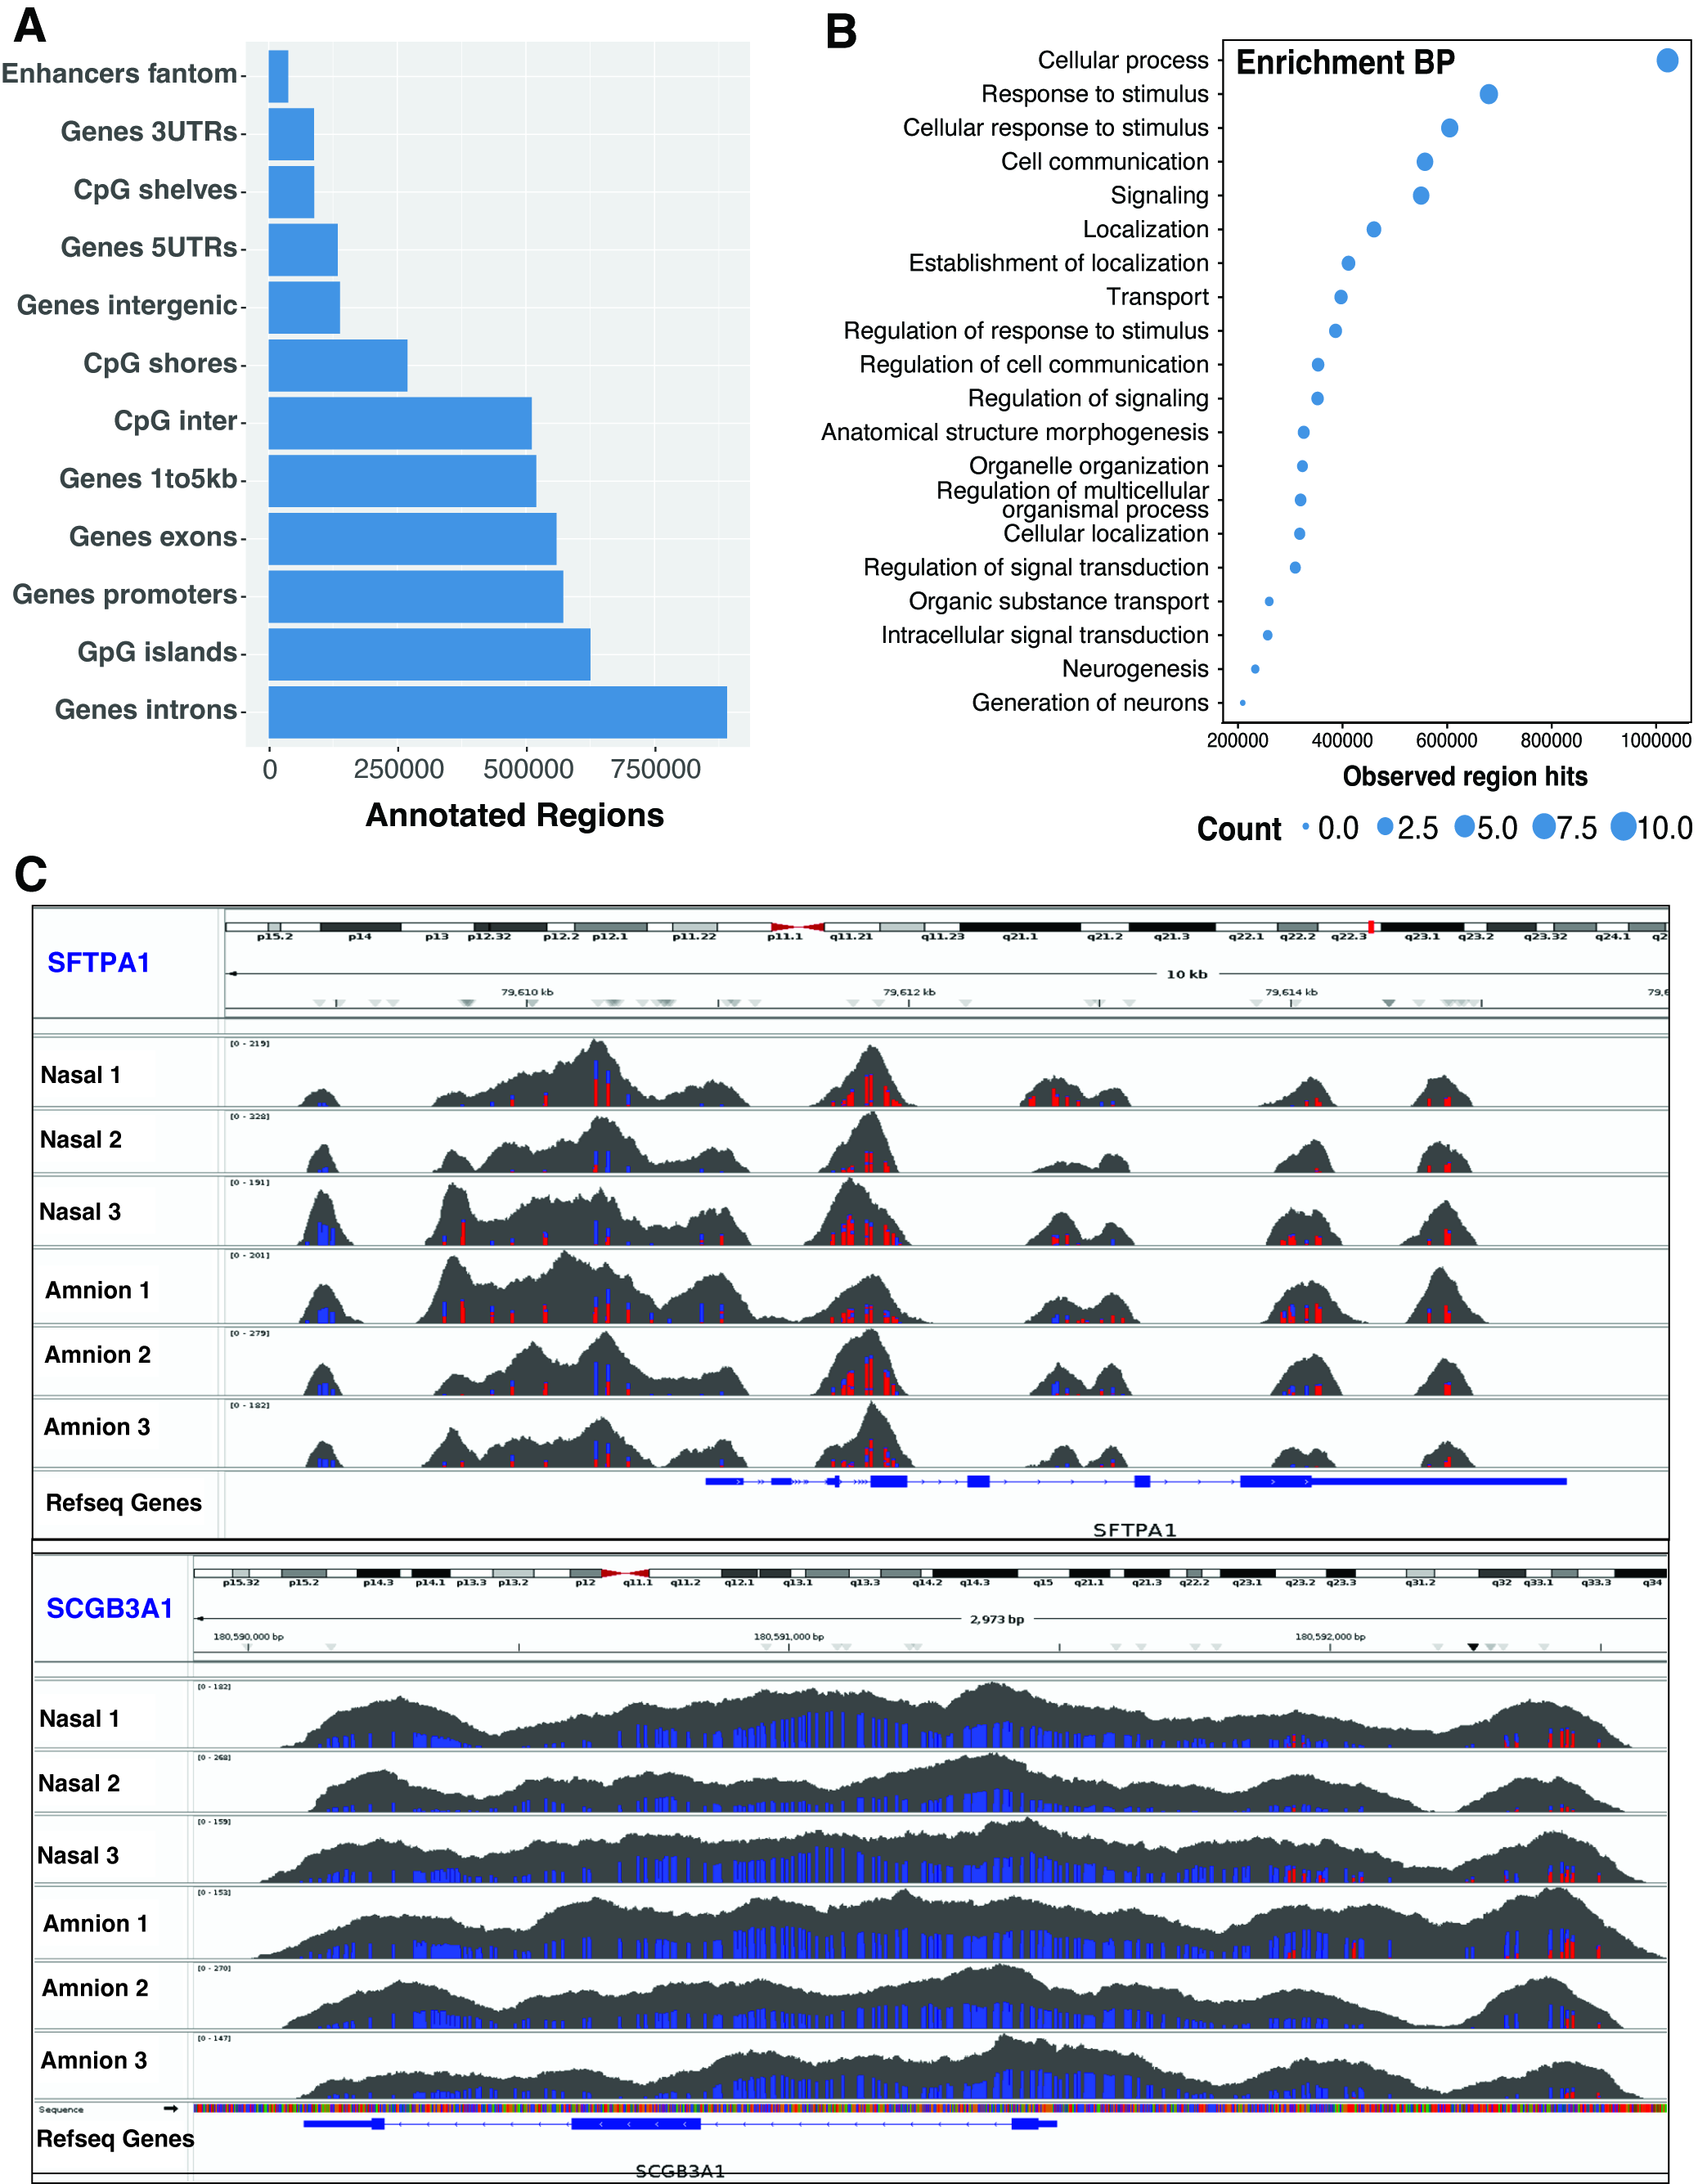


**Supplementary Figure 1. Conserved methylation landscape across tissues. (**A) Histogram counts of CpGs annotated to genomic features for the conserved methylome. (B) Significantly enriched biological processes within the conserved methylome for CpGs annotate to nearest transcriptional start sites. Point size represents count of number of genes relative to total genes within the pathway(C) Raw sequencing coverage across the *SFTPA1* gene coding region (top panel) and the *SCGB3A1* coding region. Ticks in red are methylated reads and blue represents unmethylated reads. Height of the grey silhouettes represents sequencing coverage.

**Supplementary Figure 2. Pathway enrichment of maternal asthma history.** (A) Significantly enriched biological processes within the conserved methylome for CpGs associated with maternal asthma. Point size represents count of number of genes relative to total genes within the pathway. (B)Gene Ontology (GO) enrichment was calculated using genes near CpG sites from the maternal asthma signature, followed by a similarity matrix analysis. The similarity heatmap displays GO terms associated with Biological Process (BP), with colour intensity representing the significance of enrichment.


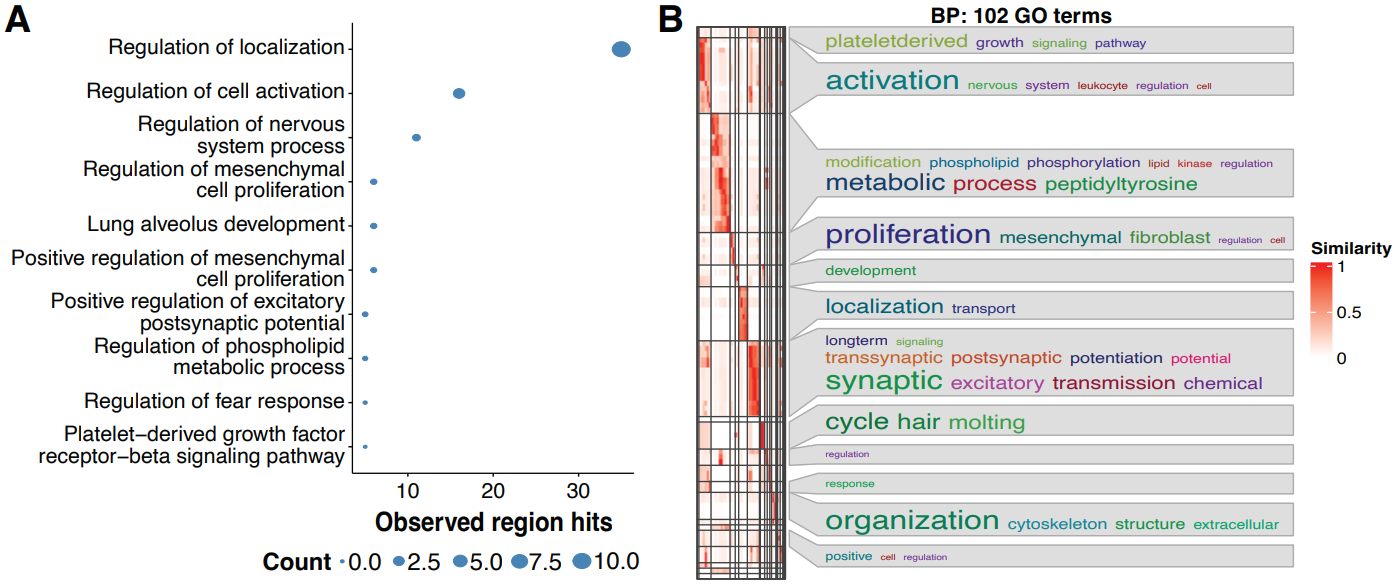


**Supplementary Figure 3. Pathway enrichment of maternal smoking exposure.** (A) Significantly enriched biological processes within the conserved methylome for CpGs associated with maternal smoking. Point size represents count of number of genes relative to total genes within the pathway. (B)Gene Ontology (GO) enrichment was calculated using genes near CpG sites from the maternal smoking signature, followed by a similarity matrix analysis. The similarity heatmap displays GO terms associated with Biological Process (BP), with colour intensity representing the significance of enrichment.

**Supplementary Figure 4. Analysis Workflow.** This study was conducted in three main phases: Sample processing and sequencing (green), Bioinformatics analysis (blue), and Statistical analysis (pink). The statistical analysis phase was further divided into four key steps: Step 1 – Dimensional reduction using Principal Component Analysis (PCA); Step 2 – Differential methylation analysis at the regional level (differentially methylated regions, DMRs) associated with tissue differences; Step 3 – Differential methylation analysis at the CpG site level (differentially methylated positions, DMPs) associated with tissue differences; Step 4 – Identification of a conserved DMP signature, which was then used to assess associations with gestational exposures (maternal asthma and maternal smoking). MD: Mean Difference; FDR: False Discovery Rate; FC: Fold Change.
